# Supplementary material for: DNA Motifs and an Accessory CRISPR Factor Determine Cas1 Binding and Integration Activity in Sulfolobus islandicus
Source: MDPI journal article supplement (doi:10.3390/ijms231710178), 2022-09-05
Supplement: s1 [file s1]

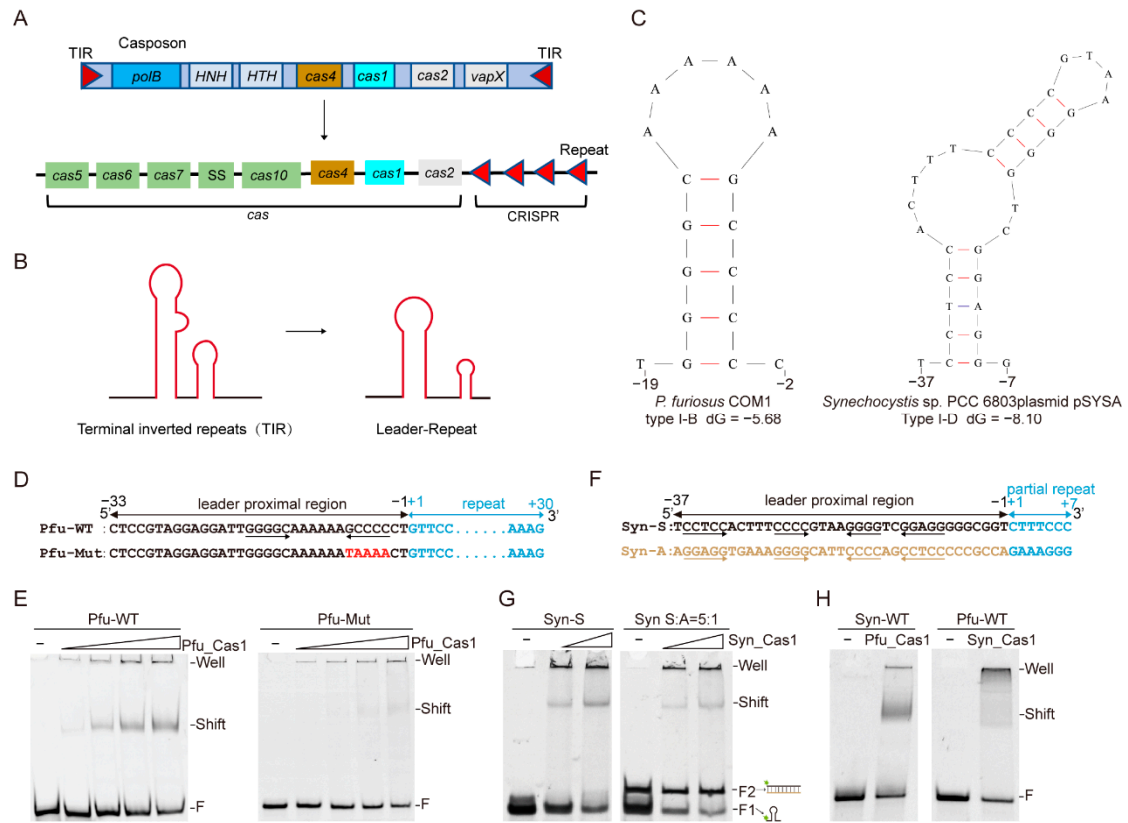

**Figure S1. A hypothesis of the evolution of CRISPR-Cas from casposon and identification of Cas1 from *Pyrococcus furiosus* COM1 and *Synechocystis* sp. PCC 6803 binding their leaders with a possible stem-loop structure. (A)** The evolution of the CRISPR-Cas system from a casposon. The *cas1* gene is shown in light blue. The Cascade genes are shown in green. **(B)** Terminal inverted repeats (TIRs) are palindromic, which share some similarity with the CRISPR leader-repeat. **(C)** Predicted stem-loop structures at the leader-proximal sites of the *Pyrococcus furiosus* COM1 and *Synechocystis* sp. PCC 6803. The stem-loop structures were predicted using the “UNAFold Web Server” and the free energy (dG) of each sequence was calculated automatically. **(D)** leader-repeat sequences from *P. furiosus* COM1. **(E)** EMSA experiments showing PfuCas1 bound the ssDNA probe of *P. furiosus* leader-repeat (Pfu-WT) and the leader-repeat mutant (Pfu-Mut), respectively. **(F)** leader-repeat sequences from *Synechocystis* sp. PCC 6803. **(G)** EMSA experiments showing SynCas1 bound the ssDNA probe of *Synechocystis* sp. PCC 6803 leader-repeat (Syn-S) and the leader-repeat mutant (Syn-Mut), and the dsDNA probe (Syn S:A=5:1), respectively. **(H)** EMSA experiments showing PfuCas1 bound the ssDNA probe of *Synechocystis* sp. PCC 6803 leader-repeat (Syn-S), and SynCas1 bound the ssDNA probe of *P. furiosus* leader-repeat (Pfu-WT), respectively. The palindromic sequences were indicated by arrows and mutations which destroyed the stem-loop were indicated by red letters. F: free probe.

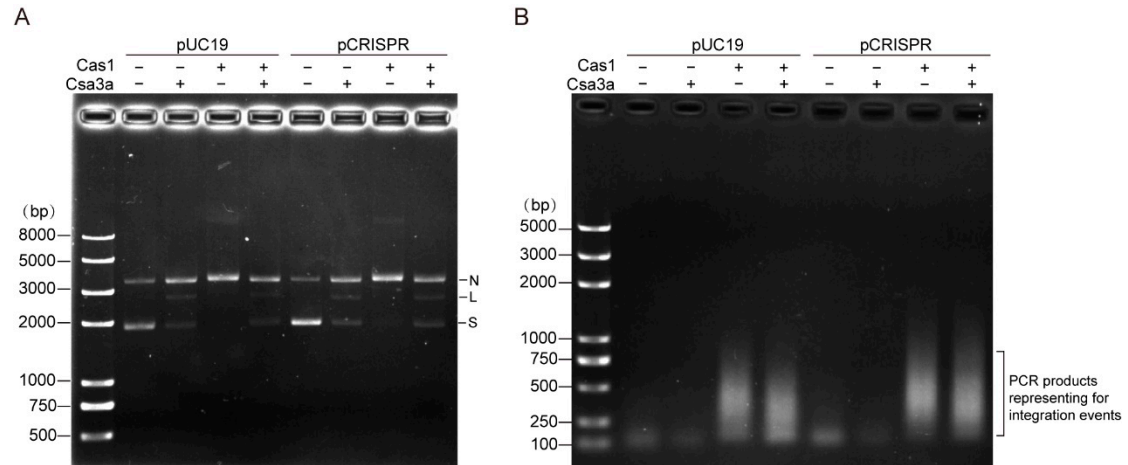

**Figure S2. *In vitro* integration of spacers into the supercoiled plasmids. (A)** Agarose gel analysis to identify the *in vitro* integration of a duplex DNA substrate into the supercoiled pUC19 and pCRISPR (pUC19 with an insertion sequence of leader-repeat) plasmids. Cas1 and/or Csa3a were incubated with 100 ng plasmids and 2  $\mu$ M 39 bp dsDNA at 55°C for 30 mins. The products were separated on a 1.5% agarose gel and stained with ethidium bromide. N: nicked, L: linear; S: supercoiled. **(B)** PCR amplification of the purified products from (A) to detect integration. A primer against the plasmid and a primer of the duplex substrate were used to amplify the DNA integrated into the plasmid. The smeared PCR products corresponding to integration events taking place at different sites.

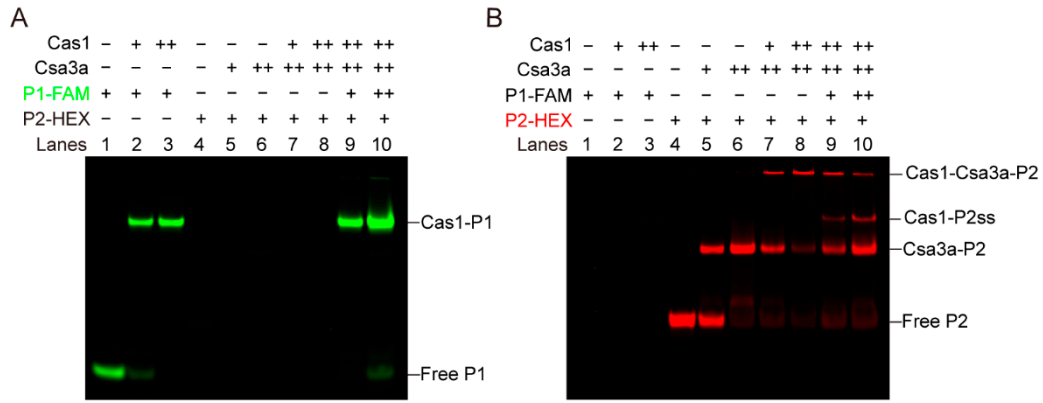

**Figure S3. EMSA assay to determine the competition of leader-proximal motif on the interaction between Csa3a and Cas1.** A 32 nt of 5'-end FAM-labeled proximal motif ssDNA with stem-loop structure was used as Probe 1 (P1), and a 50 bp of 5'-end HEX-labeled distal motif dsDNA was used as Probe 2 (P2). The same gel was scanned for fluorescence of FAM (A) and HEX (B) separately. Lane 1-3: 0.5  $\mu$ M P1 was incubated with increasing amounts of Cas1 (0, 0.6, 1.2  $\mu$ M), Lane 4-6: 0.5  $\mu$ M P2 was incubated with increasing amounts of Csa3a (0, 1.0, 2.0  $\mu$ M), Lane 7-8: 0.5  $\mu$ M P2 was incubated with 2.0  $\mu$ M Csa3a and increasing amounts of Cas1 (0.6, 1.2  $\mu$ M), Lane 9-10: increasing amounts of P1 (0.5, 1.0  $\mu$ M) was added as the competitor for Cas1 binding. The band of Cas1-P2ss might represent that Cas1 bound the trace HEX-labeled ssDNA of the distal motif with a stem-loop structure.

**Supplementary Table S1: primers used in this study**

| Primers and nucleotides                                                | Sequence (5' to 3')                                      |
|------------------------------------------------------------------------|----------------------------------------------------------|
| <b>Primers for cloning</b>                                             |                                                          |
| <i>Siscas1</i> -F-BamH I                                               | CGGGATCCATTAAGACCTTAATAATATCGG                           |
| <i>Siscas1</i> -R-Sal I                                                | ACGCGTCGACCTACAAAAGTAGTTTAAATCCGT                        |
| <i>Siscas1</i> -F-NdeI                                                 | CGCCATATGAAGACCTTAATAATATCGG                             |
| <i>Siscas1</i> -R-NotI                                                 | ATTGCGGCCGCGCAAAAGTAGTTTAAATCCGT                         |
| <i>Siscas2</i> -F-NdeI                                                 | CGCCATATGAAAATAATTGTAGTTTATG                             |
| <i>Siscas2</i> -R-NotI                                                 | ATTGCGGCCGCGCACTAACCATTCTCCACAACC                        |
| <i>Siscas3a</i> -F-NdeI                                                | CGCCATATGAAGTCATACTTTGTAACCTTTGG                         |
| <i>Siscas3a</i> -R-NotI                                                | ATTGCGGCCGCTTGAATTTCAATTTCTATATATAATTTTG                 |
| <i>Pfucas1</i> -F-NdeI                                                 | CGCCATATGAGAAAAAGTCTTTAACAAT                             |
| <i>Pfucas1</i> -R-NotI                                                 | TATGCGGCCGCAACACGCGACAAGGGG                              |
| <i>Syncas1</i> -F-NdeI                                                 | CGCCATATGAGAACGCTCTATGTGT                                |
| <i>Syncas1</i> -R-NotI                                                 | TATGCGGCCGCGCGGATTTCTAGGGAG                              |
| <i>cas6</i> -spacer-F                                                  | AAAGCTACATTGCTTTCGTCTAAGGTTTACTTCCTCCTTCCCT              |
| <i>cas6</i> -spacer-R                                                  | TAGCAGGGAAGGAGGAAGTAAACCTTAGACGAAAGCAATG<br>TAG          |
| mutL-F-Sal I                                                           | CGCGTCGACTCCGAACTGGTGAAAGATAC                            |
| mutL-R                                                                 | GTTAACAAATACTTCAAAACATTTTTGCGAATTAGTTTGA                 |
| mutR-F                                                                 | TCAAATAATTGCAAAAAATGTTTTGAAGTATTTGTTAAC                  |
| mutR-R-Not I                                                           | ATTGCGGCCGCTATTATTACTTTGATCTT                            |
| mutL-Mut1-R                                                            | GATTAGCTTCTTTGGTTTTAACCTCTATTTGATCTTTTCTTCTC<br>CC       |
| mutR-Mut1-F                                                            | AAAACCAAAGAAGCTAATCTACTATAGAATTGAAAGACAC                 |
| mutL-Mut2-R                                                            | GGGGAACCCTCTATTTGATCTTTTCTTCTCCC                         |
| mutR-Mut2-F                                                            | GATCAAATAGAGGGTTCCCCAACCTCAGCTAATCTACTA                  |
| mutL-Mut3-R                                                            | TTTTCCAAAGATATTTGATCTTTTCTTCTCCC                         |
| mutR-Mut3-F                                                            | GATCAAATATCTTTGGAAAAAACCTCAGCTAATCTACTA                  |
| mutL-Mut4-R                                                            | TTTAAACCCTCGCGGGTATCTTTTCTTCTCCCTTTCT                    |
| mutR-Mut4-F                                                            | GATACCCGCGAGGGTTAAAAAACCTCAGCTAATCTACTA                  |
| mutL-distal-R                                                          | GAGGAAATGGGGTCCCGTTCGCTTAAGGAATTCTTCATAAA<br>GATAATG     |
| mutR-distal-F                                                          | CGAACGGGACCCCCATTTCCTCGTAAAAAAGATAAGAAAGAG<br>TAATATAATA |
| mini-CRISPR-F                                                          | CGCGTCGACTTGTTTTCTTTTTCTTGTTTCG                          |
| mini-CRISPR-R                                                          | CGGGATCCATTTTTGCGAATTAGTTTGA                             |
| <b>Primers for amplification of the leader proximal CRISPR regions</b> |                                                          |
| leader-F1                                                              | CTTGTTTCGTTTTGGGTTAGGTTGT                                |
| locus1 S4-R                                                            | TATATTTGGTCCATAGGAGGACCAG                                |
| locus2-cas6R-R                                                         | AAGTCTGAGGAAGTATATTACCT                                  |

|                                                         |                                                                             |
|---------------------------------------------------------|-----------------------------------------------------------------------------|
| leader-F2                                               | GGGAGAAGAAAAGATCAAATAGAGG                                                   |
| locus1S2-R                                              | AAAGATTGAAATTCTTAAAGCTTACAAGAG                                              |
| locus2S2-R                                              | GTTAACAAATACTTCAAAACATTTTTGCGAATTAGTTTGA                                    |
| <b>Primers for EMSA and <i>in vitro</i> integration</b> |                                                                             |
| leader-WT-F                                             | FAM-CAAATAGAGGGTTAAAAAACCCCTCAGCTAATC                                       |
| leader-WT-R                                             | GATTAGCTGAGGGTTTTTTAACCCTCTATTTG                                            |
| leader-Mut1-F                                           | FAM-CAAATAGAGGGTTAAACCAAAGAAGCTAATC                                         |
| leader-Mut1-R                                           | GATTAGCTTCTTTGGTTTTTAACCCTCTATTTG                                           |
| leader-Mut3-F                                           | FAM-CAAATATCTTTGGAAAAAACCCCTCAGCTAATC                                       |
| leader-Mut3-R                                           | GATTAGCTGAGGGTTTTTTCCAAAGATATTTG                                            |
| leader-MutS-F                                           | FAM- CAAATATCTTTGGAAAACCAAAGAAGCTAATC                                       |
| leader-MutS-R                                           | GATTAGCTTCTTTGGTTTTTCCAAAGATATTTG                                           |
| newST-F                                                 | FAM-TTTTAGGGAGATTTCTATAAATCTCTTCTAGT                                        |
| newST-R                                                 | ACTAGAAGAGATTTATAGAAATCTCCCTAAAA                                            |
| leader-P1-F                                             | FAM-AGATCCCGGGAAAACCCGGAATAGTAA                                             |
| leader-P1-R                                             | TTACTATTCCCGGGTTTTCCCGGGATCT                                                |
| Pfu-leader-F                                            | FAM-<br>CTCCGTAGGAGGATTGGGGCAAAAAAGCCCCCTGTTCCAATAA<br>GACTACAAAAGAATTGAAAG |
| Pfu-leader-Mut-F                                        | CTCCGTAGGAGGATTGGGGCAAAAAATAAACTGTTCCAATAA<br>GACTACAAAAGAATTGAAAG          |
| Syn-leader-WT-F                                         | FAM-<br>TCCTCCACTTTCCCCGTAAGGGGTTCGAGGGGGCGGTCTTTCCC                        |
| Syn-leader-WT-R                                         | GGGAAAGACCGCCCCCTCCGACCCCTTACGGGGAAAGTGGAGG<br>A                            |
| Syn-leader-Mut-F                                        | FAM-<br>TCCTCCACTTTCCCCGTAATTTTTCTTCTTGGGCGGTCTTTCCC                        |
| Dup-F-FAM                                               | FAM- CGAGCTCGCCATGGTGAGCACAGAGGATAATGTAACACT                                |
| Dup-F                                                   | CGAGCTCGCCATGGTGAGCACAGAGGATAATGTAACACT                                     |
| Dup-R                                                   | AGTGTTACATTATCCTCTGTGCTCACCATGGCGAGCTCG                                     |
| M13-F                                                   | TGTAAAACGACGGCCAGT                                                          |

Restriction sites are underlined.

**Supplementary Table S2. Mass spectrometry analysis identified CRISPR-associated proteins co-purified with Cas1 in *S. islandicus* REY15A.**

| Gene ID   | Description | Coverage | Peptides | PSMs | Unique Peptides | Found in Sample |
|-----------|-------------|----------|----------|------|-----------------|-----------------|
| SiRe_0760 | Csa1        | 51.94346 | 13       | 21   | 13              | High            |
| SiRe_0761 | Cas1        | 54.13793 | 17       | 29   | 16              | High            |
| SiRe_0763 | Cas4        | 25.71429 | 4        | 5    | 4               | High            |
| SiRe_0764 | Csa3a       | 22.76786 | 5        | 6    | 5               | High            |
| SiRe_0766 | Csa5        | 16.08392 | 2        | 2    | 2               | High            |
| SiRe_0767 | Cas7        | 20.24922 | 5        | 6    | 5               | High            |
| SiRe_0768 | Cas5        | 5.416667 | 1        | 1    | 1               | High            |
| SiRe_0769 | Cas3        | 5.788423 | 3        | 3    | 3               | High            |
| SiRe_0771 | Casx        | 8.695652 | 2        | 2    | 2               | High            |
| SiRe_0598 | Cmr2        | 2.89296  | 3        | 3    | 3               | High            |
| SiRe_0600 | Cmr1        | 1.890756 | 1        | 1    | 1               | High            |
| SiRe_0603 | Cmr7        | 41.95402 | 5        | 7    | 5               | High            |

Coverage: percentage of the protein sequence covered by identified peptides. Peptides: number of peptides found in the sample. PSMs: score of peptide spectrum matches. Unique Peptides: number of unique peptides found in the sample.
